# Supplementary material for: Sodium Butyrate More Effectively Mitigates the Negative Effects of High-Concentrate Diet in Dairy Cows than Sodium β-Hydroxybutyrate via Reducing Free Bacterial Cell Wall Components in Rumen Fluid and Plasma
Source: MDPI journal article supplement (doi:10.3390/toxins13050352), 2021-05-14
Supplement: s1 [file s1]

# Supplementary Materials: Sodium Butyrate More Effectively Mitigates the Negative Effects of High-Concentrate Diet in Dairy Cows than Sodium $\beta$ -Hydroxybutyrate via Reducing Free Bacterial Cell Wall Components in Rumen Fluid and Plasma

Yongjiang Wu, Yawang Sun, Ruiming Zhang, Tianle He, Ke Tian, Junhui Liu, Juncai Chen and Guozhong Dong

**Table S1.** The primer sequences of target genes and the internal reference gene (*GAPDH*).

| Gene.                          | Primer Sequence (5' to 3')                             | Product Size/bp | NCBI Accession No. |
|--------------------------------|--------------------------------------------------------|-----------------|--------------------|
| <i>IL-1<math>\beta</math></i>  | F: AGTGCCTACGCACATGTCTTC<br>R: TCGGTCACACAGAACTCGTC    | 114             | NM_174093.1        |
| <i>IL-6</i>                    | F: TGCTGGTCTTCTGGAGTATC<br>R: GTGGCTGGAGTGGTTATTAG     | 153             | NM_173923.2        |
| <i>IL-8</i>                    | F: ATGACTTCCAAGCTGGCTGTTG<br>R: TTGATAAATTTGGGGTGGAAAG | 149             | NM_173925.2        |
| <i>TNF-<math>\alpha</math></i> | F: CCACGTTGTAGCCGACATC<br>R: CCCTGAAGAGGACCTGTGAG      | 155             | XM_005223596.4     |
| <i>TLR4</i>                    | F: AACGAAAGCAGAAAGCCACAG<br>R: GACCAGGGGCTGAAGTAACAA   | 146             | NM_174198.6        |
| <i>PGLYRP2</i>                 | F: CAGGGCATGAGCCAAGAAGA<br>R: GAGCCCACCACGAAACTGTA     | 299             | XM_002688558.5     |
| <i>TLR2</i>                    | F: TCTGCTCTTCAGGCAAAATTC<br>R: CCAGTGATTTGACCTCCACTCT  | 103             | NM_174197.2        |
| <i>NOD1</i>                    | F: TGATGACGAAGTGGCAGAGAG<br>R: CCCACGAGAAAACATCCCT     | 242             | NM_001256563.1     |
| <i>GAPDH</i>                   | F: GGGTCATCATCTCTGCACCT<br>R: GGTCATAAGTCCCTCCACGA     | 176             | NM_001034034.2     |

*IL-1 $\beta$* : interleukin-1 $\beta$ ; *IL-6*: interleukin-6; *IL-8*: interleukin-8; *TNF- $\alpha$* : tumor necrosis factor- $\alpha$ ; *TLR4*: Toll-like receptor 4; *PGLYRP2*: Peptidoglycan recognition protein 2; *TLR2*: Toll-like receptor 2; *NOD1*: nucleotide-binding oligomerization domain 1; *GAPDH*: glyceraldehyde-3-phosphate dehydrogenase.
